# Supplementary material for: Patients with COVID-19 and HBV Coinfection are at Risk of Poor Prognosis
Source: Springer Nature journal article supplement (doi:10.1007/s40121-022-00638-4), 2022-04-26
Supplement: MOESM1 [file 20345600]

## **SUPPLEMENTARY MATERIALS**

### **Patients with COVID-19 and HBV coinfection are at risk of poor prognosis**

Shanshan Yang<sup>1,2#</sup>, PhD. Shengshu Wang<sup>2,3#</sup>, PhD. Mingmei Du<sup>1#</sup>, PhD. Miao Liu<sup>2,4\*</sup>, PhD. Yunxi Liu<sup>1\*</sup>, PhD. Yao He<sup>2\*</sup> PhD.

1 Department of disease prevention and control, The 1st Medical Center, Chinese PLA General Hospital, Beijing, 100853, China;

2 Institute of geriatrics, the 2nd Medical Center, Beijing Key Laboratory of Aging and Geriatrics, National Clinical Research Center for Geriatrics Diseases, Chinese PLA General Hospital, 100853, Beijing, China;

3 Department of healthcare, Agency for Offices Administration, Central Military Commission, People's Republic of China, 100082, Beijing, China;

4 Department of statistics and epidemiology, Graduate school, Chinese PLA general hospital, Beijing, 100853, China

#These authors contributed equally to this work. [co-first]

#### **\*Corresponding author**

(1) Prof. Yao He, MD, PhD

Institute of Geriatrics, Chinese PLA General Hospital,

28 Fuxing Road, Beijing 100853, China

Tel.: 86-10-66876411; Fax: 86-10-68219351;

E-mail: yhe301@x263.net;

(2) Prof. Yunxi Liu, MD, PhD

Department of disease prevention and control, The 1st Medical Center, Chinese PLA General Hospital, Beijing, 100853, China

E-mail: 1425628298@qq.com;

(3) Prof Miao Liu, PhD

Graduate school, Chinese PLA general hospital, Beijing, 100853, China;

E-mail: liumiaolmbxb@163.com

Table S1 LSD results of age

| (I) Group               | (J) Group               | I-J      | Standard error | Sig. | 95% CI |       |
|-------------------------|-------------------------|----------|----------------|------|--------|-------|
|                         |                         |          |                |      | Lower  | Upper |
| Without CHB             | Resolved hepatitis B    | -3.932*  | .705           | .000 | -5.31  | -2.55 |
|                         | HBeAg (-) CHB/infection | -3.535   | 2.178          | .105 | -7.81  | .74   |
|                         | HBeAg (+) CHB/infection | -6.067*  | 1.953          | .002 | -9.90  | -2.24 |
|                         | HBV reactivation        | -13.952* | 5.851          | .017 | -25.43 | -2.48 |
| Resolved hepatitis B    | Without CHB             | 3.932*   | .705           | .000 | 2.55   | 5.31  |
|                         | HBeAg (-) CHB/infection | .396     | 2.250          | .860 | -4.02  | 4.81  |
|                         | HBeAg (+) CHB/infection | -2.136   | 2.033          | .294 | -6.12  | 1.85  |
|                         | HBV reactivation        | -10.021  | 5.878          | .088 | -21.55 | 1.51  |
| HBeAg (-) CHB/infection | Without CHB             | 3.535    | 2.178          | .105 | -.74   | 7.81  |
|                         | Resolved hepatitis B    | -.396    | 2.250          | .860 | -4.81  | 4.02  |
|                         | HBeAg (+) CHB/infection | -2.532   | 2.895          | .382 | -8.21  | 3.14  |
|                         | HBV reactivation        | -10.417  | 6.229          | .095 | -22.63 | 1.80  |
| HBeAg (+) CHB/infection | Without CHB             | 6.067*   | 1.953          | .002 | 2.24   | 9.90  |

|                  |                         |         |       |      |        |       |
|------------------|-------------------------|---------|-------|------|--------|-------|
| HBV reactivation | Resolved hepatitis B    | 2.136   | 2.033 | .294 | -1.85  | 6.12  |
|                  | HBeAg (-) CHB/infection | 2.532   | 2.895 | .382 | -3.14  | 8.21  |
|                  | HBV reactivation        | -7.885  | 6.154 | .200 | -19.95 | 4.18  |
|                  | Without CHB             | 13.952* | 5.851 | .017 | 2.48   | 25.43 |
|                  | Resolved hepatitis B    | 10.021  | 5.878 | .088 | -1.51  | 21.55 |
|                  | HBeAg (-) CHB/infection | 10.417  | 6.229 | .095 | -1.80  | 22.63 |
|                  | HBeAg (+) CHB/infection | 7.885   | 6.154 | .200 | -4.18  | 19.95 |

\*. P<0.05

Table S2 LSD results of BMI

| (I) Group               | (J) Group               | I-J       | Standard error | Sig  | 95% CI  |        |
|-------------------------|-------------------------|-----------|----------------|------|---------|--------|
|                         |                         |           |                |      | Lower   | Upper  |
| Without CHB             | Resolved hepatitis B    | .36920*   | .17805         | .038 | .0201   | .7183  |
|                         | HBeAg (-) CHB/infection | -1.14240* | .55032         | .038 | -2.2215 | -.0633 |
|                         | HBeAg (+) CHB/infection | -.55497   | .49338         | .261 | -1.5224 | .4124  |
|                         | HBV reactivation        | 2.71989   | 1.47811        | .066 | -.1784  | 5.6181 |
| Resolved hepatitis B    | Without CHB             | -.36920*  | .17805         | .038 | -.7183  | -.0201 |
|                         | HBeAg (-) CHB/infection | -1.51160* | .56846         | .008 | -2.6262 | -.3970 |
|                         | HBeAg (+) CHB/infection | -.92417   | .51353         | .072 | -1.9311 | .0827  |
|                         | HBV reactivation        | 2.35069   | 1.48495        | .114 | -.5610  | 5.2624 |
| HBeAg (-) CHB/infection | Without CHB             | 1.14240*  | .55032         | .038 | .0633   | 2.2215 |
|                         | Resolved hepatitis B    | 1.51160*  | .56846         | .008 | .3970   | 2.6262 |
|                         | HBeAg (+) CHB/infection | .58742    | .73135         | .422 | -.8466  | 2.0214 |
|                         | HBV reactivation        | 3.86229*  | 1.57361        | .014 | .7768   | 6.9478 |
| HBeAg (+) CHB/infection | Without CHB             | .55497    | .49338         | .261 | -.4124  | 1.5224 |
|                         | Resolved hepatitis B    | .92417    | .51353         | .072 | -.0827  | 1.9311 |

|                  |                         |           |         |      |         |        |
|------------------|-------------------------|-----------|---------|------|---------|--------|
|                  | HBeAg (-) CHB/infection | -.58742   | .73135  | .422 | -2.0214 | .8466  |
|                  | HBV reactivation        | 3.27487*  | 1.55461 | .035 | .2266   | 6.3231 |
| HBV reactivation | Without CHB             | -2.71989  | 1.47811 | .066 | -5.6181 | .1784  |
|                  | Resolved hepatitis B    | -2.35069  | 1.48495 | .114 | -5.2624 | .5610  |
|                  | HBeAg (-) CHB/infection | -3.86229* | 1.57361 | .014 | -6.9478 | -.7768 |
|                  | HBeAg (+) CHB/infection | -3.27487* | 1.55461 | .035 | -6.3231 | -.2266 |

\*, P<0.05

Table S3 LSD results of DBP

| (I) Group               | (J) Group               | I-J     | Standard error | Sig   | 95% CI |       |
|-------------------------|-------------------------|---------|----------------|-------|--------|-------|
|                         |                         |         |                |       | Lower  | Upper |
| Without CHB             | Resolved hepatitis B    | -0.939  | 0.553          | 0.089 | -2.02  | 0.14  |
|                         | HBeAg (-) CHB/infection | -2.603  | 1.708          | 0.128 | -5.95  | 0.75  |
|                         | HBeAg (+) CHB/infection | 0.547   | 1.531          | 0.721 | -2.46  | 3.55  |
|                         | HBV reactivation        | 15.450* | 4.587          | 0.001 | 6.46   | 24.44 |
| Resolved hepatitis B    | Without CHB             | 0.939   | 0.553          | 0.089 | -0.14  | 2.02  |
|                         | HBeAg (-) CHB/infection | -1.665  | 1.764          | 0.345 | -5.12  | 1.79  |
|                         | HBeAg (+) CHB/infection | 1.485   | 1.594          | 0.351 | -1.64  | 4.61  |
|                         | HBV reactivation        | 16.388* | 4.608          | 0     | 7.35   | 25.42 |
| HBeAg (-) CHB/infection | Without CHB             | 2.603   | 1.708          | 0.128 | -0.75  | 5.95  |
|                         | Resolved hepatitis B    | 1.665   | 1.764          | 0.345 | -1.79  | 5.12  |
|                         | HBeAg (+) CHB/infection | 3.15    | 2.27           | 0.165 | -1.3   | 7.6   |
|                         | HBV reactivation        | 18.053* | 4.883          | 0     | 8.48   | 27.63 |
| HBeAg (+) CHB/infection | Without CHB             | -0.547  | 1.531          | 0.721 | -3.55  | 2.46  |
|                         | Resolved hepatitis B    | -1.485  | 1.594          | 0.351 | -4.61  | 1.64  |

|                  |                         |          |       |       |        |       |
|------------------|-------------------------|----------|-------|-------|--------|-------|
| HBV reactivation | HBeAg (-) CHB/infection | -3.15    | 2.27  | 0.165 | -7.6   | 1.3   |
|                  | HBV reactivation        | 14.903*  | 4.824 | 0.002 | 5.44   | 24.36 |
|                  | Without CHB             | -15.450* | 4.587 | 0.001 | -24.44 | -6.46 |
|                  | Resolved hepatitis B    | -16.388* | 4.608 | 0     | -25.42 | -7.35 |
|                  | HBeAg (-) CHB/infection | -18.053* | 4.883 | 0     | -27.63 | -8.48 |
|                  | HBeAg (+) CHB/infection | -14.903* | 4.824 | 0.002 | -24.36 | -5.44 |

\*. P<0.05

Table S4 HRs and 95% CI of different HBV infection status for death and ICU in patients with COVID19 (excluded patients with MELD score  $\geq 20$ )

|                      | Cases        | Model A            | Model B            | Model C                | Model D                | Model E          |
|----------------------|--------------|--------------------|--------------------|------------------------|------------------------|------------------|
| <b>ICU</b>           |              |                    |                    |                        |                        |                  |
| Without CHB          | 68 (3.0)     | 1                  | 1                  | 1                      | 1                      | 1                |
| Resolved hepatitis B | 28 (5.6)     | 0.94 (0.60-1.48)   | 0.90 (0.57-1.41)   | 0.88 (0.56-1.38)       | 0.83 (0.52-1.30)       | 0.44 (0.27-0.72) |
| HBeAg (-) CHB        | 2 (4.5)      | 0.89 (0.22-3.66)   | 0.81 (0.20-3.30)   | 0.81 (0.20-3.31)       | 0.79 (0.19-3.24)       | 0.22 (0.05-0.95) |
| HBeAg (+) CHB        | 18<br>(34.6) | 10.42 (6.18-17.57) | 7.46 (4.38-12.68)  | 7.56 (4.45-12.83)      | 7.48 (4.33-12.94)      | 1.73 (0.95-3.16) |
| HBV reactivation     | 3 (60.0)     | 4.15 (1.26-13.74)  | 3.68 (1.09-12.44)  | 3.94 (1.16-13.33)      | 3.45 (0.96-12.34)      | 0.15 (0.04-0.63) |
| <b>Death</b>         |              |                    |                    |                        |                        |                  |
| Without CHB          | 36 (1.6)     | 1                  | 1                  | 1                      | 1                      | 1                |
| Resolved hepatitis B | 10 (2.0)     | 0.89 (0.44-1.80)   | 0.81 (0.40-1.65)   | 0.81 (0.40-1.64)       | 0.77 (0.38-1.57)       | 0.48 (0.23-1.02) |
| HBeAg (-) CHB        | 1 (2.3)      | 1.05 (0.14-7.65)   | 0.90 (0.12-6.57)   | 0.89 (0.12-6.55)       | 0.95 (0.13-6.97)       | 0.35 (0.05-2.80) |
| HBeAg (+) CHB        | 15<br>(28.8) | 17.46 (9.55-31.92) | 12.22 (6.61-22.61) | 12.19 (6.59-<br>22.54) | 10.56 (5.57-<br>20.05) | 2.94 (1.47-5.87) |
| HBV reactivation     | 0 (0.0)      | (-)                | (-)                | (-)                    | (-)                    | (-)              |

---

Model A: Crude model;

Model B: Adjusted for age and gender;

Model C: Adjusted for age, gender, nationalities and marital status;

Model D: Adjusted for age, gender, nationalities, marital status, hypertension, diabetes, CVD, cancer and BMI;

Model E: Adjusted for age, gender, nationalities, marital status, hypertension, diabetes, CVD, cancer, BMI, types, steroid hormones, antibiotics, antiviral medication and antineoplastic drugs.

Table S5 HRs and 95% CI of different HBV infection status for death and ICU in male and female patients with COVID19.

|                      | Male      |                   |                   | Female   |                      |                     |
|----------------------|-----------|-------------------|-------------------|----------|----------------------|---------------------|
|                      | Cases     | Crude Model       | Adjusted Model    | Cases    | Crude Model          | Adjusted Model      |
| <b>ICU</b>           |           |                   |                   |          |                      |                     |
| Without CHB          | 48 (4.2)  | 1                 | 1                 | 22 (1.9) | 1                    | 1                   |
| Resolved hepatitis B | 19 (7.3)  | 0.86 (0.5-1.48)   | 0.82 (0.47-1.43)  | 11 (4.6) | 1.26 (0.6-2.65)      | 1.14 (0.53-2.44)    |
| HBeAg (-) CHB        | 2 (7.1)   | 0.99 (0.24-4.11)  | 0.88 (0.21-3.66)  | 0 (0.0)  | (-)                  | (-)                 |
| HBeAg (+) CHB        | 12 (33.3) | 7.01 (3.71-13.24) | 5.36 (2.73-10.51) | 8 (42.1) | 22.28 (9.87-50.32)   | 14.79 (6.07-36.02)  |
| HBV reactivation     | 0 (0.0)   | (-)               | (-)               | 4 (80.0) | 8.27 (2.40-28.50)    | 7.25 (1.96-26.82)   |
| <b>Death</b>         |           |                   |                   |          |                      |                     |
| Without CHB          | 27 (2.3)  | 1                 | 1                 | 10 (0.9) |                      | 1                   |
| Resolved hepatitis B | 7 (2.7)   | 0.77 (0.33-1.80)  | 0.74 (0.31-1.74)  | 4 (1.7)  | 1.37 (0.42-4.47)     | 1.17 (0.36-3.84)    |
| HBeAg (-) CHB        | 1 (3.6)   | 1.06 (0.14-7.86)  | 1.01 (0.14-7.48)  | 0 (0.0)  | (-)                  | (-)                 |
| HBeAg (+) CHB        | 10 (27.8) | 11.05 (5.33-22.9) | 6.50 (3.01-14.02) | 7 (36.8) | 41.47 (15.70-109.52) | 42.5 (14.46-124.88) |
| HBV reactivation     | 0 (0.0)   | (-)               | (-)               | 0 (0.0)  | (-)                  | (-)                 |

Adjusted model: Adjusted for age, nationalities, marital status, hypertension, diabetes, CVD, cancer and BMI

Table S6 HRs and 95% CI of different HBV infection status for death and ICU in <60ys and ≥60ys patients with COVID19

|                      | <60ys    |                    |                     | ≥60ys     |                    |                    |
|----------------------|----------|--------------------|---------------------|-----------|--------------------|--------------------|
|                      | Cases    | Crude Model        | Adjusted Model      | Cases     | Crude Model        | Adjusted Model     |
| <b>ICU</b>           |          |                    |                     |           |                    |                    |
| Without CHB          | 10 (0.9) | 1                  | 1                   | 60 (5.1)  | 1                  | 1                  |
| Resolved hepatitis B | 6 (2.8)  | 1.65 (0.58-4.71)   | 1.52 (0.53-4.4)     | 24 (8.4)  | 0.86 (0.53-1.40)   | 0.77 (0.47-1.26)   |
| HBeAg (-) CHB        | 0 (0.0)  | (-)                | (-)                 | 2 (7.7)   | 0.91 (0.22-3.74)   | 0.93 (0.22-3.86)   |
| HBeAg (+) CHB        | 2 (10.5) | 19.52 (4.18-91.04) | 15.94 (3.24-78.49)  | 18 (50.0) | 7.35 (4.29-12.57)  | 7.74 (4.47-13.41)  |
| HBV reactivation     | 0 (0.0)  | (-)                | (-)                 | 4 (66.7)  | 4.45 (1.51-13.11)  | 4.81 (1.53-15.17)  |
| <b>Death</b>         |          |                    |                     |           |                    |                    |
| Without CHB          | 4 (0.4)  | 1                  | 1                   | 33 (2.8)  |                    | 1                  |
| Resolved hepatitis B | 3 (1.4)  | 2.41 (0.51-11.32)  | 1.9 (0.38-9.52)     | 8 (2.8)   | 0.72 (0.33-1.57)   | 0.67 (0.3-1.46)    |
| HBeAg (-) CHB        | 0 (0.0)  | (-)                | (-)                 | 1 (3.8)   | 1.07 (0.15-7.82)   | 1.09 (0.15-8.04)   |
| HBeAg (+) CHB        | 1 (5.3)  | 21.30 (2.35-192.8) | 19.65 (2.15-179.29) | 16 (44.4) | 13.96 (7.67-25.42) | 11.65 (6.18-21.94) |
| HBV reactivation     | 0 (0.0)  | (-)                | (-)                 | 0 (0.0)   | (-)                | (-)                |

Adjusted model: Adjusted for age, nationalities, marital status, hypertension, diabetes, CVD, cancer and BMI
